# Supplementary material
Source: HighWire-hosted journal article supplement (https://jnis.bmj.com/content/13/1/79)
Supplement: inline-supplementary-material-1 [file inline-supplementary-material-1.pdf]

## Pulsatile Tinnitus Severity Score

### **Right Ear**

In the right ear, I notice a repeated whooshing sound (please check only one):

- ☐ All the time or nearly all the time
- ☐ Some of the time (at least multiple times a day)
- ☐ Rarely (not every day or for very brief periods each day)
- ☐ Never or almost never

In the right ear, I would rate the severity of the whooshing sound, when present, as (please check only one):

- ☐ Severe (loud and distracting)
- ☐ Moderate (sometimes loud, occasionally distracting)
- ☐ Mild (quiet, rarely distracting)
- ☐ No whooshing sound present in this ear

### **Left Ear**

In the left ear, I notice a repeated whooshing sound (please check only one):

- ☐ All the time or nearly all the time
- ☐ Some of the time (at least multiple times a day)
- ☐ Rarely (not every day or for very brief periods each day)
- ☐ Never or almost never

In the left ear, I would rate the severity of the whooshing sound, when present, as (please check only one):

- ☐ Severe (loud and distracting)
- ☐ Moderate (sometimes loud, occasionally distracting)
- ☐ Mild (quiet, rarely distracting)
- ☐ No whooshing sound present in this ear
